# Supplementary material for: Nanoparticle-based hierarchical zinc oxide chains for enhanced efficiency of dye-sensitized solar cells
Source: Royal Society of Chemistry journal article supplement (doi:10.1039/c5ra21847k), 2015-01-01
Supplement: c5ra21847k1.pdf [file c5ra21847k1.pdf]

## Electronic Supplementary Information

# Nanoparticle-Based Hierarchical Zinc Oxide Chains for Enhanced Efficiency of Dye-Sensitized Solar Cells

Zhengdao Li,<sup>a</sup> Yong Zhou,<sup>b, c \*</sup> Ruixue Sun<sup>a</sup>, Yuhan Yang,<sup>a</sup> Kaijun Zhang<sup>a</sup>

<sup>a</sup> *Chemistry and Pharmaceutical Engineering College, Nanyang Normal University, Nanyang, Henan 473061, P. R. China.*

<sup>b</sup> *Jiangsu Key Laboratory for Nano Technology, Eco-Materials and Renewable Energy Research Center (ERERC), Nanjing University, Nanjing, JiangSu 210093, P. R. China. E-mail: [zhouyong1999@nju.edu.cn](mailto:zhouyong1999@nju.edu.cn)*

<sup>c</sup> *Kunshan Innovation Institute of Nanjing University, Kunshan, Jiangsu 215300, P. R. China.*

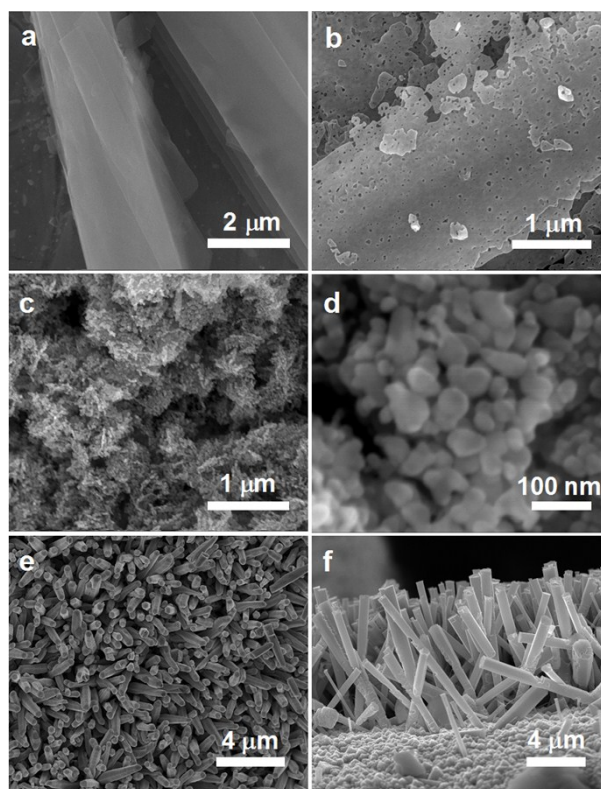

**Fig. S1.** SEM images of: (a) the precursor  $\text{Zn}_5(\text{OH})_6(\text{CO}_3)_2$ . (b) as-synthesized sample calcined under  $450^\circ\text{C}$ . (c, d) the ZnO nanoparticles. (e) top view and (f)

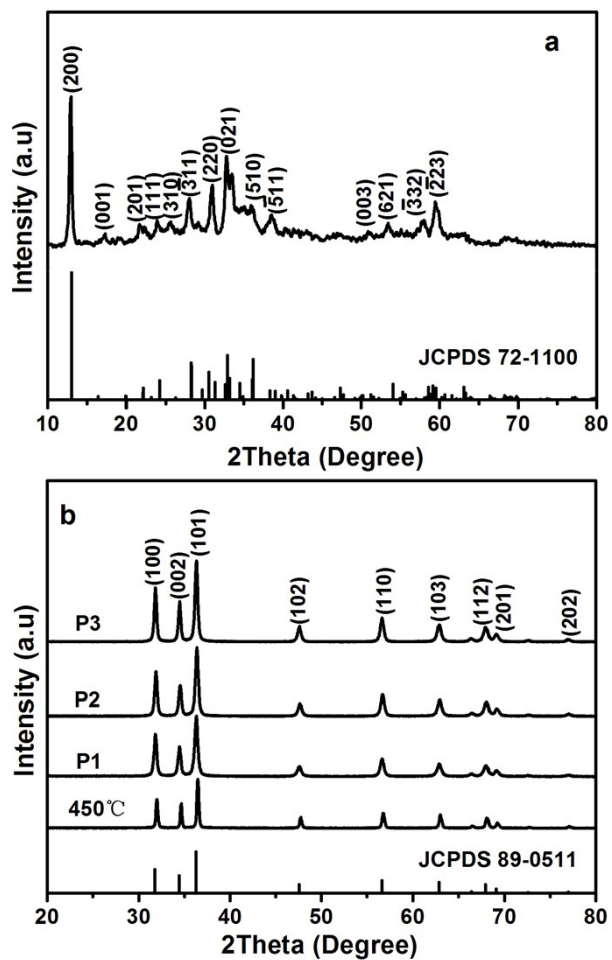

**Fig. S2.** XRD patterns of (a) the precursor  $Zn_5(OH)_6(CO_3)_2$  and (b) four samples.

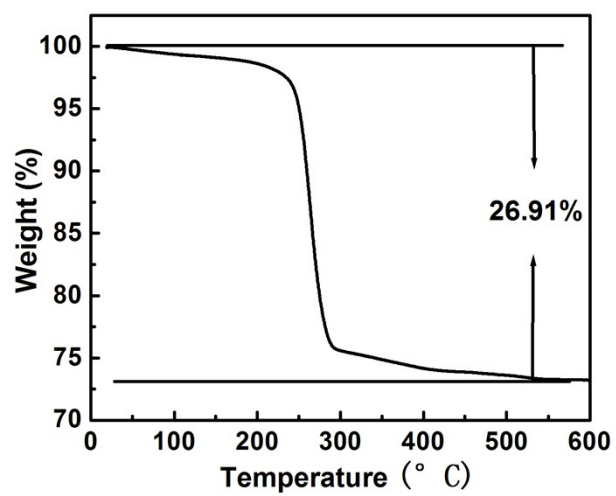

**Fig. S3.** TG curves of the precursor  $\text{Zn}_5(\text{OH})_6(\text{CO}_3)_2$ .
